# Supplementary material for: Associations between obesity, a composite risk score for probable long COVID, and sleep problems in SARS-CoV-2 vaccinated individuals
Source: PubMed Central journal article supplement (PMC11347373; doi:10.1038/s41366-024-01556-w), 2024-06-07
Supplement: 41366_2024_1556_MOESM1_ESM.pdf [file 41366_2024_1556_MOESM1_ESM.pdf]

**Supplementary Information: Associations Between Obesity, a  
Composite Risk Score for Probable Long COVID, and Sleep  
Problems in SARS-CoV-2 Vaccinated Individuals**

Pei Xue<sup>1\*</sup>, Ilona Merikanto<sup>2</sup>, Eva A. Delale<sup>3</sup>, Adrijana Bjelajac<sup>4</sup>, Juliana Yordanova<sup>5</sup>, Rachel N.Y. Chan<sup>6</sup>, Maria Korman<sup>7</sup>, Sérgio A. Mota-Rolim<sup>8</sup>, Anne-Marie Landtblom<sup>9,10</sup>, Kentaro Matsui<sup>11</sup>, Catia Reis<sup>12,13</sup>, Thomas Penzel<sup>14</sup>, Yuichi Inoue<sup>15,16</sup>, Michael R. Nadorff<sup>17,18</sup>, Brigitte Holzinger<sup>19</sup>, Charles M. Morin<sup>20</sup>, Colin A. Espie<sup>21</sup>, Giuseppe Plazzi<sup>22,23</sup>, Luigi De Gennaro<sup>24,25</sup>, Frances Chung<sup>26</sup>, Bjørn Bjorvatn<sup>27,28</sup>, Yun Kwok Wing<sup>6</sup>, Yves Dauvilliers<sup>29,30</sup>, Markku Partinen<sup>31,32</sup>, Christian Benedict<sup>1\*</sup>

<sup>1</sup> Department of Pharmaceutical Biosciences, Uppsala University, Sweden

<sup>2</sup> Research Programs Unit, Faculty of Medicine, University of Helsinki, Helsinki, Finland

<sup>3</sup> Institute for Anthropological Research, Zagreb, Croatia

<sup>4</sup> Institute for Medical Research and Occupational Health, Zagreb, Croatia

<sup>5</sup> Institute of Neurobiology, Bulgarian Academy of Sciences, Sofia, Bulgaria

<sup>6</sup> Li Chiu Kong Family Sleep Assessment Unit, Department of Psychiatry, Faculty of Medicine, The Chinese University of Hong Kong, Hong Kong SAR, China

<sup>7</sup> Department of Occupational Therapy, Faculty of Health Sciences, Ariel University, Ariel, Israel

<sup>8</sup> Brain Institute, Federal University of Rio Grande do Norte, Brazil

<sup>9</sup> Department of Medical Sciences, Uppsala University, Sweden

<sup>10</sup> Department of Biomedical and Clinical Sciences, Faculty of Medicine and Health Sciences, Linköping University, Sweden

<sup>11</sup> Department of Clinical Laboratory, National Center Hospital, National Center of Neurology and Psychiatry, Tokyo, Japan

<sup>12</sup> Instituto de Medicina Molecular João Lobo Antunes, Faculdade de Medicina, Universidade de Lisboa, Lisbon, Portugal

<sup>13</sup> Faculdade de Ciências Humanas, Universidade Católica Portuguesa, Lisbon, Portugal

<sup>14</sup> Sleep Medicine Center, Charite University Hospital Berlin, Berlin, Germany

<sup>15</sup> Department of Somnology, Tokyo Medical University, Tokyo, Japan

<sup>16</sup> Japan Somnology Center, Institute of Neuropsychiatry, Tokyo, Japan

<sup>17</sup> Department of Psychology, Mississippi State University, USA

<sup>18</sup> Department of Psychiatry and Behavioral Sciences, Baylor College of Medicine, USA

<sup>19</sup> Medical University of Vienna, Postgraduate, Schlafcoaching

<sup>20</sup> Centre de recherche CERVO/Brain Research Center, École de psychologie, Université Laval, Quebec City, Quebec, Canada

<sup>21</sup> Sleep and Circadian Neuroscience Institute, Nuffield Department of Clinical

Neurosciences, University of Oxford, Oxford, UK

<sup>22</sup> IRCCS Istituto Delle Scienze Neurologiche di Bologna, Bologna, Italy

<sup>23</sup> Department of Biomedical, Metabolic and Neural Sciences, University of Modena and Reggio Emilia, Modena, Italy

<sup>24</sup> Department of Psychology, Sapienza University of Rome, Roma, Lazio, Italy

<sup>25</sup> IRCCS Fondazione Santa Lucia, Roma, Italy

<sup>26</sup> Department of Anesthesiology and Pain Medicine, University Health Network, University of Toronto, Toronto, Ontario, Canada

<sup>27</sup> Department of Global Public Health and Primary Care, University of Bergen, Bergen, Norway

<sup>28</sup> Norwegian Competence Center for Sleep Disorders, Haukeland University Hospital, Bergen, Norway

<sup>29</sup> Sleep-Wake Disorders Unit, Department of Neurology, Gui-de-Chauliac Hospital, CHU, Montpellier, France

<sup>30</sup> INM, University Montpellier, INSERM, Montpellier, France

<sup>31</sup> Department of Clinical Neurosciences, University of Helsinki Clinicum Unit, Helsinki, Finland

<sup>32</sup> Helsinki Sleep Clinic, Terveystalo Healthcare Services, Helsinki, Finland

\* Correspondence: [pei.xue@uu.se](mailto:pei.xue@uu.se) or [christian.benedict@uu.se](mailto:christian.benedict@uu.se)

1 **Table of Contents**

2 **Table S1.** Final sample estimation ..... 4

3 **Table S2.** Ethical approval summary across participating countries..... 5

4 **Table S3.** Participant's country of residence at the time of the survey (N = 5919) ..... 6

5 **Table S4.** Frequency of long COVID symptoms categorized by body mass index status (N = 5919)..... 7

6 **Table S5.** Frequency of long COVID symptoms categorized by body mass index and probable long COVID

7 status (N = 5919) ..... 8

8 **Table S6.** Association of BMI status with probable long COVID categorized by sex (N = 5919)..... 9

9 **Table S7.** Odds ratio for probable long COVID categorized by BMI status, excluding individuals with PASC

10 scores between 3 to 11 (N = 5318) ..... 10

11 **Table S8.** Association of BMI status with probable long COVID, excluding participants from the USA (N=

12 5449)..... 11

13 **Table S9.** Association of BMI status with probable long COVID, excluding participants with a BMI smaller

14 than 18.5 kg/m<sup>2</sup> (N = 5507) ..... 12

15  
16  
17  
18

**Table S1.** Final sample estimation

| <b>Exclusion criteria</b>                                                                                                            | <b>N</b>    |
|--------------------------------------------------------------------------------------------------------------------------------------|-------------|
| Participants who filled out the survey                                                                                               | 16899       |
| Participant underwent fewer than two SARS-CoV-2 mRNA vaccinations                                                                    | -7711       |
| Participant reported inoculation with vaccines other than mRNA <b>OR</b> participant was unclear about the administered vaccine type | -1147       |
| Participant did not specify age                                                                                                      | -2          |
| Participant did not specify race/ethnicity                                                                                           | -1440       |
| Participant did not specify smoking status                                                                                           | -98         |
| Participant did not specify weekly physical activity level                                                                           | -155        |
| Participant did not specify main living area                                                                                         | -3          |
| Participant did not specify BMI                                                                                                      | -88         |
| Participant did not provide information about long COVID symptoms used for scoring the post-acute sequelae of SARS-CoV-2             | -114        |
| Participant did not specify the date when the first SARS-CoV-2 mRNA vaccination was scheduled                                        | -64         |
| Participant did not specify nightly sleep duration <b>OR</b> nightly sleep duration was shorter than 3 hours or longer than 15 hours | -19         |
| Participant did not fill out all questions required to estimate the insomnia severity index score                                    | -38         |
| Participant did not fill out all questions required to estimate the risk for obstructive sleep apnea                                 | -5          |
| Participant did not specify history of type 2 diabetes                                                                               | -11         |
| Participant did not specify history of attention deficit hyperactivity disorder                                                      | -1          |
| Participant did not specify history of depression                                                                                    | -2          |
| Participant's body mass index was more than three standard deviations away from the population mean                                  | -82         |
| <b>Final cohort</b>                                                                                                                  | <b>5919</b> |

**Table S2.** Ethical approval summary across participating countries

| Country           | Ethical diary number                       | Notes                                                                                                                                                                 |
|-------------------|--------------------------------------------|-----------------------------------------------------------------------------------------------------------------------------------------------------------------------|
| Austria           | --                                         | According to national research governance and regulations, the anonymous nature of survey collection did not require ethical evaluation or approval in this country   |
| Brazil            | --                                         | According to national research governance and regulations, the anonymous nature of survey collection did not require ethical evaluation or approval in this country   |
| Bulgaria          | Protocol Number 46/05.08.2021              | Ethics Commission of the Institute of Neurobiology, Bulgarian Academy of Sciences                                                                                     |
| Canada            | 2020-151-A-1-R-1 21-05-2021<br>REB#20-5540 | The "Comité d'éthique de l'Université Laval » reviewed and approved this research protocol. University Health Network Research Ethics Board, Toronto, Ontario, Canada |
| China (Hong Kong) | 2020.277                                   | Joint Chinese University of Hong Kong-New Territories East Cluster Clinical Research Ethics Committee                                                                 |
| Croatia           | 100-21/21-4 (07.05.2021)                   | Ethics Committee of the Institute for Medical Research and Occupational Health                                                                                        |
| Finland           | --                                         | According to national research governance and regulations, the anonymous nature of survey collection did not require ethical evaluation or approval in this country   |
| France            | --                                         | According to national research governance and regulations, the anonymous nature of survey collection did not require ethical evaluation or approval in this country   |
| Germany           | EA1/162/20                                 | Ethics Committee of Charite University Hospital Berlin                                                                                                                |
| Israel            | AU-HEA-MK-20210603                         | The study was approved by the Ariel University Human Research Ethics Committee of the Faculty of Health Sciences                                                      |
| Italy             | protocol number: 0000861, April 24, 2021   | Institutional Ethics Committee of the Department of Psychology of the Sapienza University of Rome                                                                     |
| Japan             | No. 198/2020                               | The ethics committee of the Neuropsychiatric Research Institute, Tokyo, Japan                                                                                         |
| Norway            | --                                         | According to national research governance and regulations, the anonymous nature of survey collection did not require ethical evaluation or approval in this country   |
| Portugal          | CES-UCP n°142, May 27th, 2022              | The project was approved unanimously by the Life Sciences Ethical Commission of the Portuguese Catholic University                                                    |
| Sweden            | --                                         | According to national research governance and regulations, the anonymous nature of survey collection did not require ethical evaluation or approval in this country   |
| USA               | IRB-20-257                                 | Deemed exempt by the Mississippi State University Institutional Review Board.                                                                                         |

**Table S3.** Participant's country of residence at the time of the survey ( $N = 5919$ )

| <b>Country</b>    | <b><i>N</i> (%)</b> | <b>Age, mean (SD)</b> | <b>Female sex, %</b> |
|-------------------|---------------------|-----------------------|----------------------|
| Japan             | 2535 (42.8)         | 50.2 (16.8)           | 46.1                 |
| Sweden            | 484 (8.2)           | 53.6 (14.2)           | 89.5                 |
| USA               | 470 (7.9)           | 19.4 (3.7)            | 74.3                 |
| Austria           | 323 (5.5)           | 44.1 (13.6)           | 78.6                 |
| Germany           | 286 (4.8)           | 52.0 (13.4)           | 43.7                 |
| Israel            | 272 (4.6)           | 34.2 (13.5)           | 75.7                 |
| Norway            | 243 (4.1)           | 43.0 (14.6)           | 74.1                 |
| Canada            | 214 (3.6)           | 50.9 (15.4)           | 75.2                 |
| Italy             | 221 (3.7)           | 37.6 (14.8)           | 76.9                 |
| Croatia           | 187 (3.2)           | 45.4 (12.6)           | 74.3                 |
| France            | 182 (3.1)           | 44.7 (13.5)           | 70.9                 |
| Bulgaria          | 138 (2.3)           | 44.2 (10.0)           | 84.1                 |
| China (Hong Kong) | 121 (2.0)           | 35.9 (13.7)           | 67.8                 |
| Portugal          | 118 (2.0)           | 41.6 (14.5)           | 73.7                 |
| Finland           | 101 (1.7)           | 46.2 (13.5)           | 81.2                 |
| Brazil            | 7 (0.1)             | 41.4 (12.2)           | 71.4                 |
| Other             | 17 (0.3)            | 39.2 (11.5)           | 76.5                 |

**Table S4.** Frequency of long COVID symptoms categorized by body mass index status ( $N = 5919$ )

| <b>Long COVID symptom</b>           | <b>PASC subscore</b> | <b>Normal weight, N = 3406</b> | <b>Overweight, N = 1710</b> | <b>Obesity, N = 803</b> | <b>P value</b> |
|-------------------------------------|----------------------|--------------------------------|-----------------------------|-------------------------|----------------|
| Post-exertional malaise             | 7                    | 156 (4.6)                      | 112 (6.5)                   | 139 (17.3)              | <.001          |
| Fatigue                             | 1                    | 433 (12.7)                     | 228 (13.3)                  | 190 (23.7)              | <.001          |
| Brain fog                           | 3                    | 206 (6.0)                      | 131 (7.7)                   | 144 (17.9)              | <.001          |
| Dizziness                           | 1                    | 143 (4.2)                      | 83 (4.9)                    | 65 (8.1)                | <.001          |
| Gastrointestinal tract problems     | 1                    | 62 (1.8)                       | 42 (2.5)                    | 51 (6.4)                | <.001          |
| Palpitations                        | 2                    | 130 (3.8)                      | 85 (5.0)                    | 74 (9.2)                | <.001          |
| Loss of or change in smell or taste | 8                    | 61 (1.8)                       | 34 (2.0)                    | 37 (4.6)                | <.001          |
| Chest pain                          | 2                    | 125 (3.7)                      | 81 (4.7)                    | 97 (12.1)               | <.001          |

Data are presented as numbers (percentages). Group comparisons were conducted using Chi-Square tests. A significance level of  $P < .05$  was used to determine statistical significance. *Abbreviations:* PASC, post-acute sequelae SARS-CoV-2.

**Table S5.** Frequency of long COVID symptoms categorized by body mass index and probable long COVID status (N = 5919)

| Long COVID symptom                  | Participants with normal weight |                | Participants with overweight |                | Participants with obesity |                |
|-------------------------------------|---------------------------------|----------------|------------------------------|----------------|---------------------------|----------------|
|                                     | PASC score <12                  | PASC score ≥12 | PASC score <12               | PASC score ≥12 | PASC score <12            | PASC score ≥12 |
| Participants, total                 | 3313                            | 93             | 1652                         | 58             | 729                       | 74             |
| Post-exertional malaise             | 76 (2.3)                        | 80 (86.0) *    | 60 (3.6)                     | 52 (89.7) *    | 69 (9.5)                  | 70 (94.6) *    |
| Fatigue                             | 346 (10.4)                      | 87 (93.5) *    | 177 (10.7)                   | 51 (87.9) *    | 129 (17.7)                | 61 (82.4) *    |
| Brain fog                           | 133 (4.0)                       | 73 (78.5) *    | 82 (5.0)                     | 49 (84.5) *    | 79 (10.8)                 | 65 (87.8) *    |
| Dizziness                           | 90 (2.7)                        | 53 (57.0) *    | 45 (2.7)                     | 38 (65.5) *    | 22 (3.0)                  | 43 (58.1) *    |
| Gastrointestinal tract problems     | 37 (1.1)                        | 25 (26.9) *    | 20 (1.2)                     | 22 (37.9) *    | 25 (3.4)                  | 26 (35.1) *    |
| Palpitations                        | 79 (2.4)                        | 51 (54.8) *    | 57 (3.5)                     | 28 (48.3) *    | 31 (4.3)                  | 43 (58.1) *    |
| Loss of or change in smell or taste | 31 (0.9)                        | 30 (32.3) *    | 7 (0.4)                      | 27 (46.6) *    | 13 (1.8)                  | 24 (32.4) *    |
| Chest pain                          | 75 (2.3)                        | 50 (53.8) *    | 48 (2.9)                     | 33 (56.9) *    | 51 (7.0)                  | 46 (62.2) *    |

Data are presented as numbers (percentages). Group comparisons were conducted using Chi-Square tests. A significance level of  $P < .05$  was used to determine statistical significance. \* $p < 0.05$  indicates significance for PASC (post-acute sequelae SARS-CoV-2) score  $\geq 12$  (indicative of probable long COVID) compared to PASC score  $< 12$  within each BMI group.



**Table S6.** Association of BMI status with probable long COVID categorized by sex (*N* = 5919)

| Group         | <i>N</i> (%) | PASC score $\geq 12$ , <i>N</i> (%) | OR [95% CI] for having probable long COVID |                  |
|---------------|--------------|-------------------------------------|--------------------------------------------|------------------|
|               |              |                                     | unadjusted                                 | adjusted         |
| Men           |              |                                     |                                            |                  |
| Normal weight | 1097 (49.4)  | 11 (1.0)                            | 1                                          | 1                |
| Overweight    | 828 (37.3)   | 8 (1.0)                             | 0.96 [0.39-2.41]                           | 0.56 [0.21-1.52] |
| Obesity       | 294 (13.2)   | 14 (4.8)                            | 4.94 [2.22-10.99]                          | 1.14 [0.42-3.06] |
| Women         |              |                                     |                                            |                  |
| Normal weight | 2309 (62.4)  | 82 (3.6)                            | 1                                          | 1                |
| Overweight    | 882 (23.8)   | 50 (5.7)                            | 1.63 [1.14-2.34]                           | 1.02 [0.68-1.53] |
| Obesity       | 509 (13.8)   | 60 (11.8)                           | 3.63 [2.56-5.14]                           | 1.59 [1.04-2.43] |

A PASC score  $\geq 12$  was defined as having probable long COVID. Adjusted OR were derived from a logistic regression model that included the time elapsed since the first mRNA vaccination, as well as participants' age, race/ethnicity, SARS-CoV-2 test positivity, smoking status, main living area, weekly physical activity level status score, hypertension history, type 2 diabetes history, attention deficit hyperactivity disorder history, and depression history. *Abbreviations:* PASC, post-acute sequelae SARS-CoV-2.

**Table S7.** Odds ratio for probable long COVID categorized by BMI status, excluding individuals with PASC scores between 3 to 11 ( $N = 5318$ )

| BMI group     | N (%)       | PASC score $\geq 12$ , N (%) | OR [95%-CI] for having probable long COVID |                  |
|---------------|-------------|------------------------------|--------------------------------------------|------------------|
|               |             |                              | unadjusted                                 | adjusted         |
| Normal weight | 3134 (58.9) | 93 (3.0)                     | 1                                          | 1                |
| Overweight    | 1542 (29.0) | 58 (3.8)                     | 1.28 [0.92-1.78]                           | 0.80 [0.54-1.19] |
| Obesity       | 642 (12.1)  | 74 (11.5)                    | 4.26 [3.10-5.86]                           | 2.07 [1.36-3.14] |

A PASC score  $\geq 12$  was defined as having probable long COVID. Adjusted OR were derived from a logistic regression model that included the time elapsed since the first mRNA vaccination, as well as participants' sex, age, race/ethnicity, SARS-CoV-2 test positivity, smoking status, main living area, weekly physical activity level status score, hypertension history, type 2 diabetes history, attention deficit hyperactivity disorder history, and depression history. *Abbreviations:* PASC, post-acute sequelae SARS-CoV-2.

**Table S8.** Association of BMI status with probable long COVID, excluding participants from the USA (N= 5449)

| BMI group     | N (%)       | PASC score $\geq 12$ , N (%) | OR [95%-CI] for having probable long COVID |                  |
|---------------|-------------|------------------------------|--------------------------------------------|------------------|
|               |             |                              | unadjusted                                 | adjusted         |
| Normal weight | 3114 (57.1) | 88 (2.8)                     | 1                                          | 1                |
| Overweight    | 1618 (29.7) | 58 (3.6)                     | 1.28 [0.91-1.79]                           | 0.95 [0.65-1.39] |
| Obesity       | 717 (13.2)  | 74 (10.3)                    | 3.96 [2.87-5.45]                           | 1.58 [1.06-2.36] |

A PASC score  $\geq 12$  was defined as having probable long COVID. Adjusted OR were derived from a logistic regression model that included the time elapsed since the first mRNA vaccination, as well as participants' sex, age, race/ethnicity, SARS-CoV-2 test positivity, smoking status, main living area, weekly physical activity level status score, hypertension history, type 2 diabetes history, attention deficit hyperactivity disorder history, and depression history. *Abbreviations:* PASC, post-acute sequelae SARS-CoV-2.

**Table S9.** Association of BMI status with probable long COVID, excluding participants with a BMI smaller than 18.5 kg/m<sup>2</sup> (N = 5507)

| BMI group     | N (%)       | PASC score ≥12, N (%) | OR [95%-CI] for having probable long COVID |                  |
|---------------|-------------|-----------------------|--------------------------------------------|------------------|
|               |             |                       | unadjusted                                 | adjusted         |
| Normal weight | 2994 (54.4) | 84 (2.8)              | 1                                          | 1                |
| Overweight    | 1710 (31.1) | 58 (3.4)              | 1.22 [0.87-1.71]                           | 0.94 [0.64-1.38] |
| Obesity       | 803 (14.6)  | 74 (9.2)              | 3.52 [2.55-4.86]                           | 1.57 [1.06-2.34] |

A PASC score ≥12 was defined as having probable long COVID. Adjusted OR were derived from a logistic regression model that included the time elapsed since the first mRNA vaccination, as well as participants' sex, age, race/ethnicity, SARS-CoV-2 test positivity, smoking status, main living area, weekly physical activity level status score, hypertension history, type 2 diabetes history, attention deficit hyperactivity disorder history, and depression history. *Abbreviations:* PASC, post-acute sequelae SARS-CoV-2.
